# Supplementary material for: Comparing the Utility of Mitochondrial and Nuclear DNA to Adjust for Genetic Ancestry in Association Studies
Source: PubMed Central journal article supplement (PMC6523867; doi:10.3390/cells8040306), 2019-04-03
Supplement: cells-08-00306-s001.pdf [file cells-08-00306-s001.pdf]

## Supplement Data

### A Comparison of Mitochondrial and Nuclear DNA Utility for Controlling Genetic Ancestry in Association Studies

Brendan Miller<sup>1</sup>, Thalida E. Arpawong<sup>1</sup>, Henry Jiao<sup>1</sup>, Su-Jeong Kim<sup>1</sup>, Kelvin Yen<sup>1</sup>, Hemal M. Mehta<sup>1</sup>, Junxiang Wan<sup>1</sup>, John C. Carpten<sup>2</sup>, Pinchas Cohen<sup>1\*</sup>

<sup>1</sup> Leonard Davis School of Gerontology, University of Southern California, Los Angeles, CA

<sup>2</sup> Department of Translational Genomics and Institute for Translational Genomics, Keck School of Medicine of the University of Southern California, Los Angeles, California

\* Correspondence: [hassy@usc.edu](mailto:hassy@usc.edu)

Table S1: mtSNP Frequencies in HRS

| mtSNP      | Frequency |
|------------|-----------|
| MitoT217C  | 1.14%     |
| MitoG247A  | 4.54%     |
| MitoC295T  | 7.74%     |
| MitoC458T  | 4.08%     |
| MitoT479C  | 1.93%     |
| MitoT491C  | 11.40%    |
| MitoG752A  | 2.04%     |
| MitoC1050T | 0.87%     |
| MitoT1191C | 4.47%     |
| MitoG1440A | 4.14%     |
| MitoG1721A | 4.57%     |
| MitoT2160C | 0.97%     |
| MitoG2708A | 30.88%    |
| MitoG3012A | 18.90%    |
| MitoA3349G | 0.33%     |
| MitoT3395C | 0.87%     |
| MitoA3721G | 1.04%     |
| MitoG3916A | 1.76%     |
| MitoG3919A | 1.52%     |
| MitoC3971T | 0.25%     |
| MitoC3993T | 1.48%     |
| MitoA4825G | 3.95%     |

|             |        |
|-------------|--------|
| MitoC4884T  | 0.87%  |
| MitoA4918G  | 7.78%  |
| MitoT4978C  | 2.34%  |
| MitoT5005C  | 1.28%  |
| MitoG5047A  | 3.50%  |
| MitoT5443C  | 1.01%  |
| MitoT5496C  | 0.98%  |
| MitoA5657G  | 1.27%  |
| MitoG5774A  | 1.83%  |
| MitoA5952G  | 1.76%  |
| MitoG6027A  | 0.70%  |
| MitoC6046T  | 1.01%  |
| MitoG6261A  | 1.39%  |
| MitoT6681C  | 1.17%  |
| MitoT6777C  | 3.27%  |
| MitoA7056G  | 3.00%  |
| MitoT7176C  | 3.38%  |
| MitoG7522A  | 9.87%  |
| MitoG8617T  | 0.59%  |
| MitoA8870G  | 0.24%  |
| MitoA9073G  | 1.72%  |
| MitoA9094G  | 0.41%  |
| MitoG9378A  | 0.64%  |
| MitoC9541T  | 20.61% |
| MitoA9668G  | 0.91%  |
| MitoT9699C  | 6.39%  |
| MitoT10035C | 2.04%  |
| MitoA10045G | 0.65%  |
| MitoG10311A | 0.38%  |
| MitoT10322C | 1.22%  |
| MitoG10399A | 34.32% |
| MitoA10551G | 6.12%  |
| MitoG10590A | 1.61%  |

|             |        |
|-------------|--------|
| MitoG10689A | 4.29%  |
| MitoC10874T | 20.68% |
| MitoA11252G | 15.00% |
| MitoG11378A | 1.45%  |
| MitoA11468G | 16.93% |
| MitoT11900C | 0.56%  |
| MitoG11915A | 8.80%  |
| MitoA12309G | 17.30% |
| MitoG12373A | 17.43% |
| MitoG12631A | 0.38%  |
| MitoC12670T | 0.08%  |
| MitoT12706C | 29.63% |
| MitoA13106G | 8.08%  |
| MitoA13264G | 2.55%  |
| MitoA13781G | 2.07%  |
| MitoT13790C | 3.36%  |
| MitoT14179C | 3.56%  |
| MitoA14234G | 5.85%  |
| MitoG15044A | 6.73%  |
| MitoC15536T | 2.36%  |
| MitoT15671C | 1.07%  |
| MitoA15759G | 1.03%  |
| MitoT15785C | 4.05%  |
| MitoA15925G | 4.51%  |
| MitoG15929A | 7.66%  |
| MitoG15931A | 1.00%  |
| MitoG16130A | 9.15%  |
| MitoT16145C | 0.14%  |
| MitoG16146A | 3.35%  |
| MitoC16149T | 1.61%  |
| MitoA16163G | 1.73%  |
| MitoA16164G | 2.04%  |
| MitoC16272T | 8.38%  |

|             |       |
|-------------|-------|
| MitoC16329T | 3.22% |
| MitoG16393A | 2.12% |
